# Supplementary material
Source: PubMed Central journal article supplement (PMC5544942)

**Extended Data Fig. 1a:**

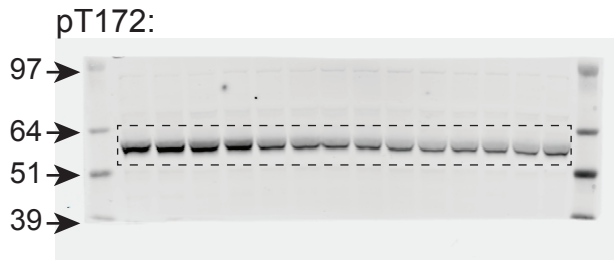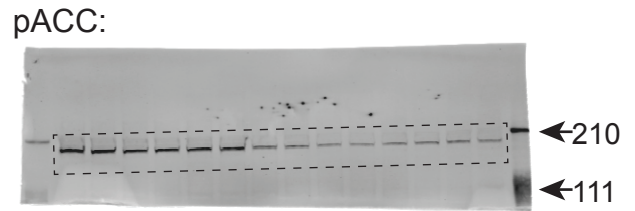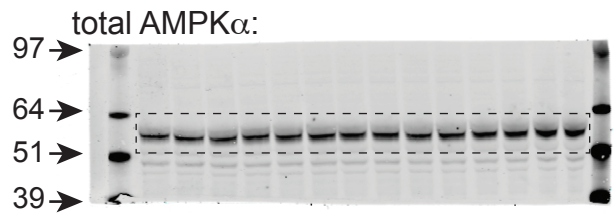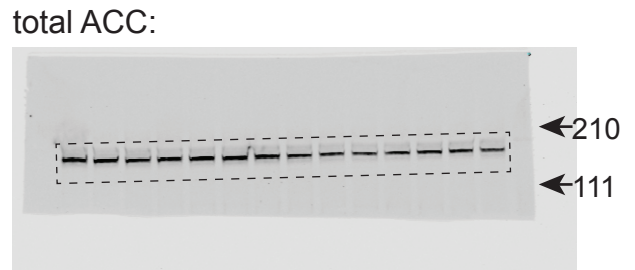

**Fig. 2a:**

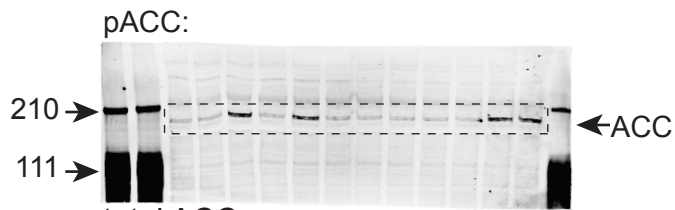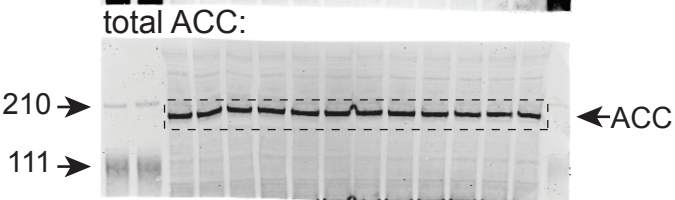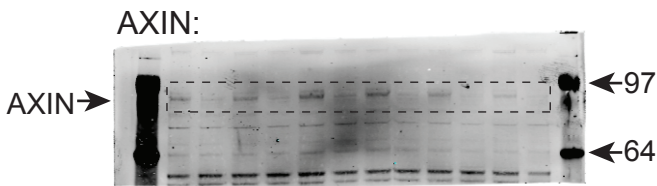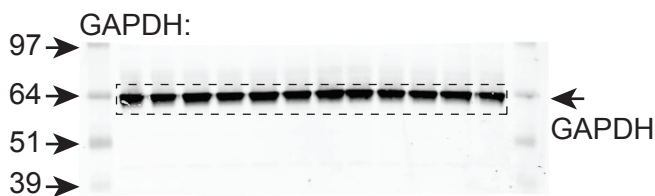

**Fig. 2b:**

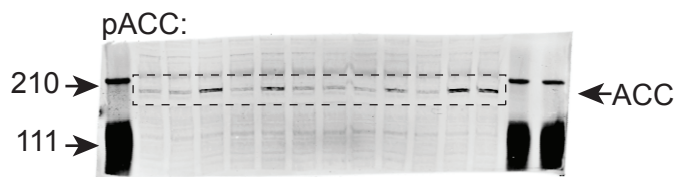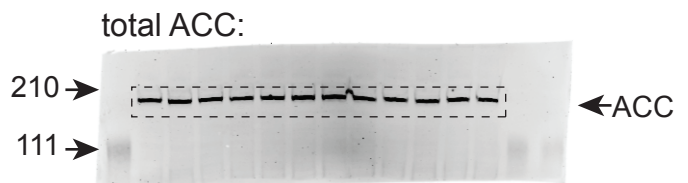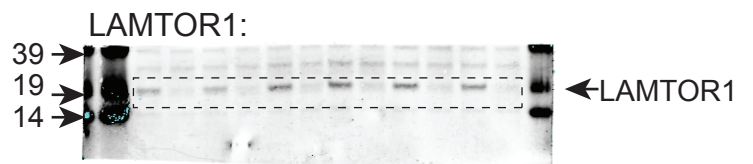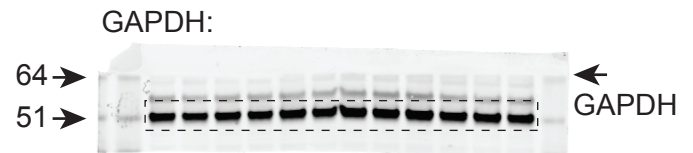

**Fig. 2e:**

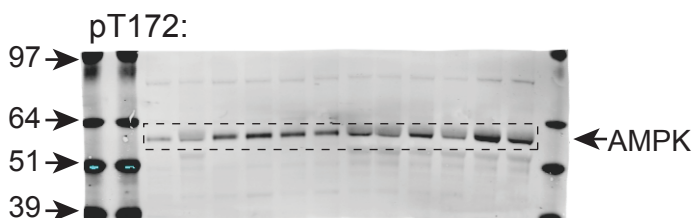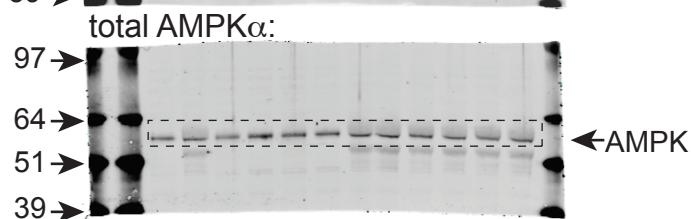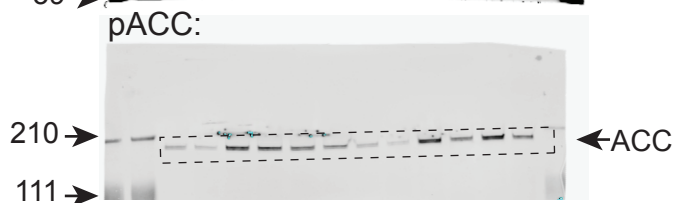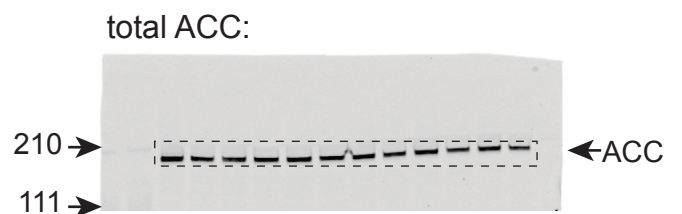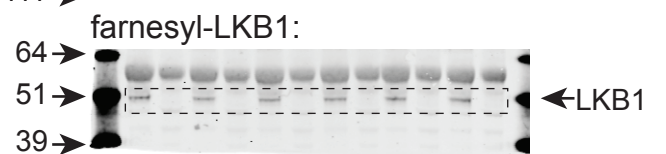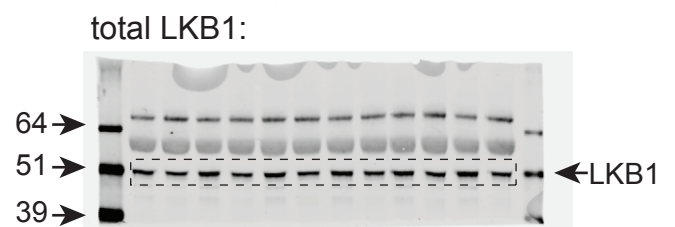

## Extended Data Fig. 1g:

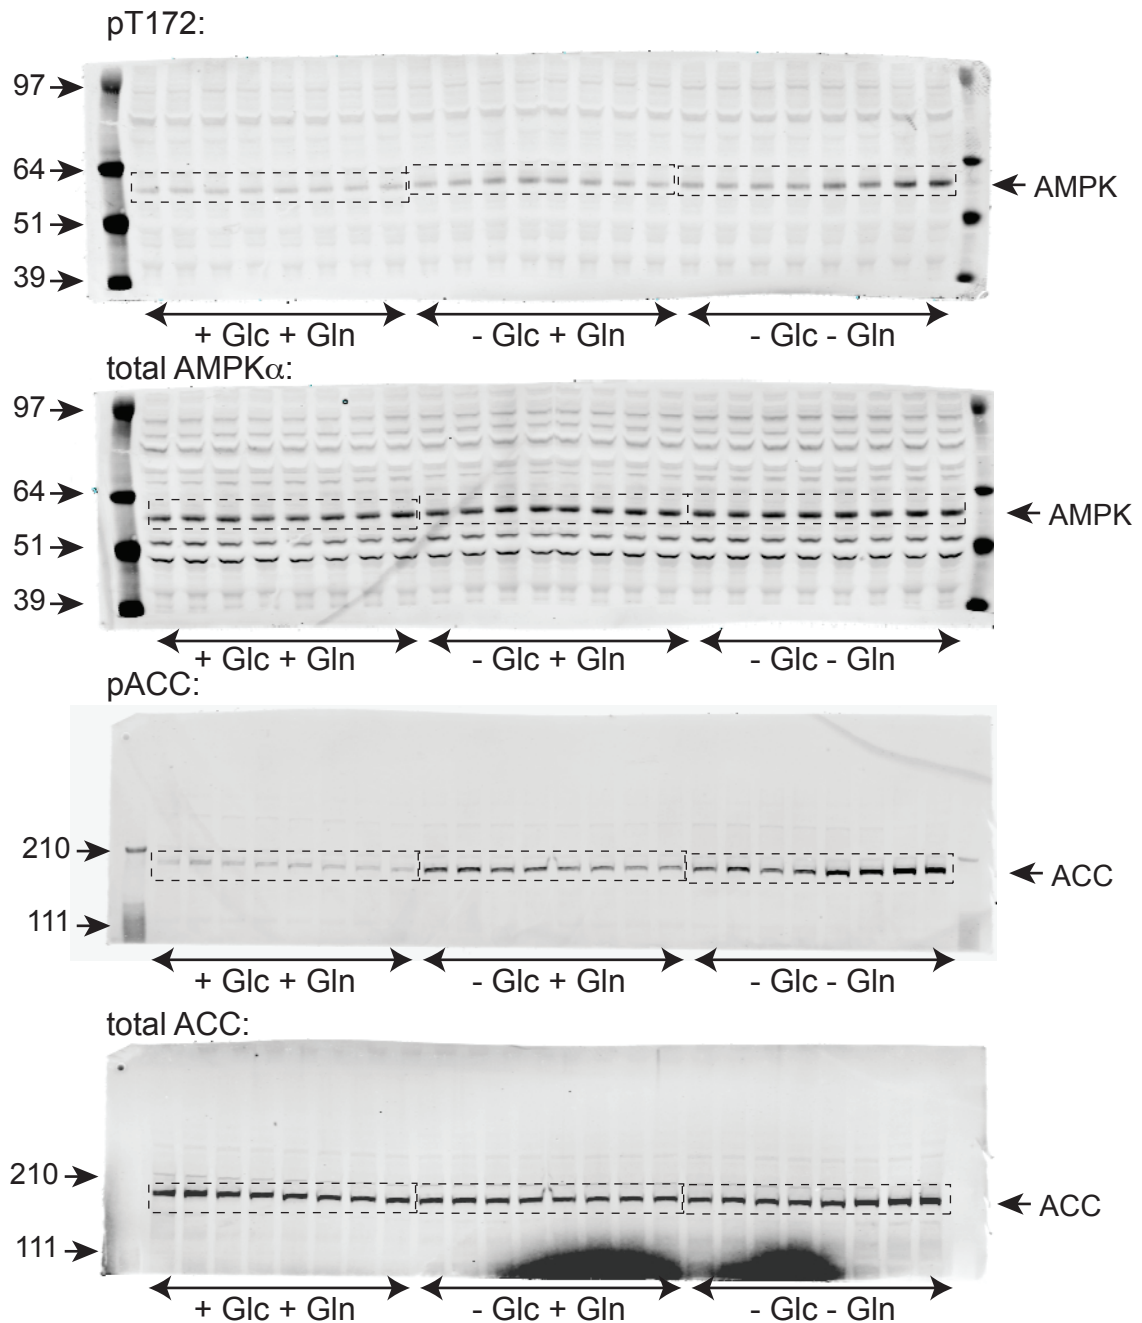

Note that to ensure uniform detection, all time points and conditions were run on single gels with 24 wells, which were then cropped in three sections of 8 wells each as shown, to generate Extended Data Fig. 1g.

The SeeBlue® Plus2 Pre-stained Protein Standard, Cat. LC5925, from ThermoFisher Scientific, was used as the protein marker.

Blots, as shown below, were cut into slices before incubation with primary antibodies. The Pierce™ Prestained Protein MW Marker, Cat. 26612, from ThermoFisher Scientific, was used as the protein marker.

**Fig. 3a**

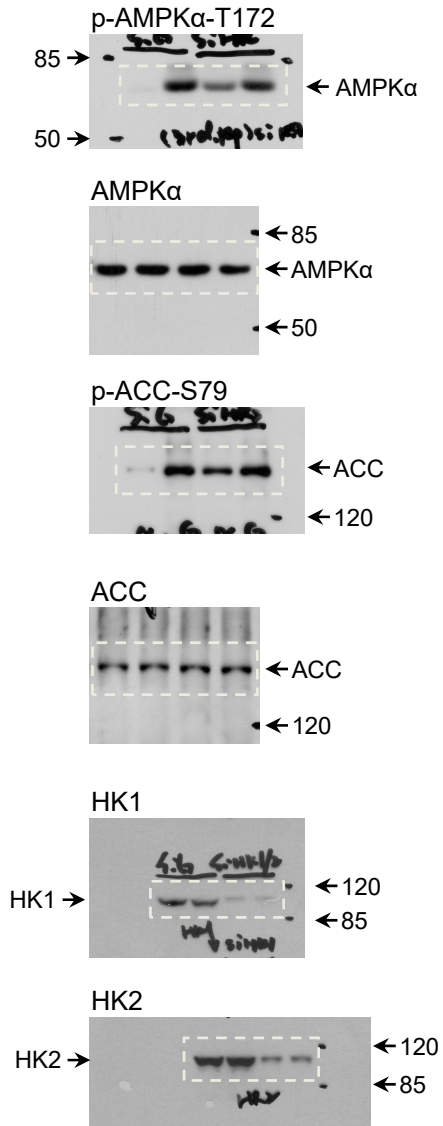

**Fig. 3b**

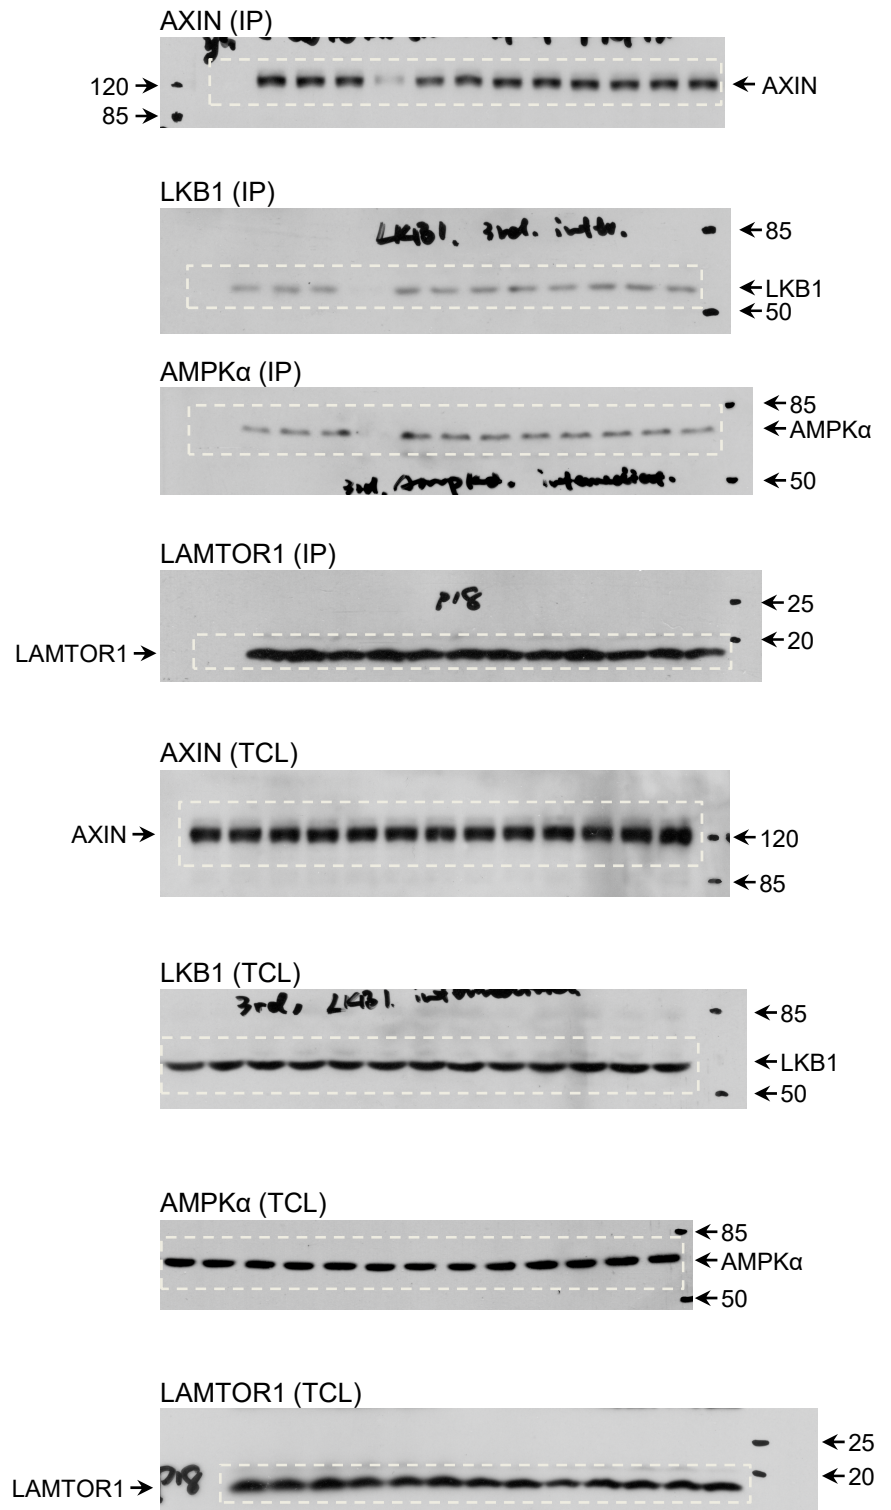

**Fig. 3c**

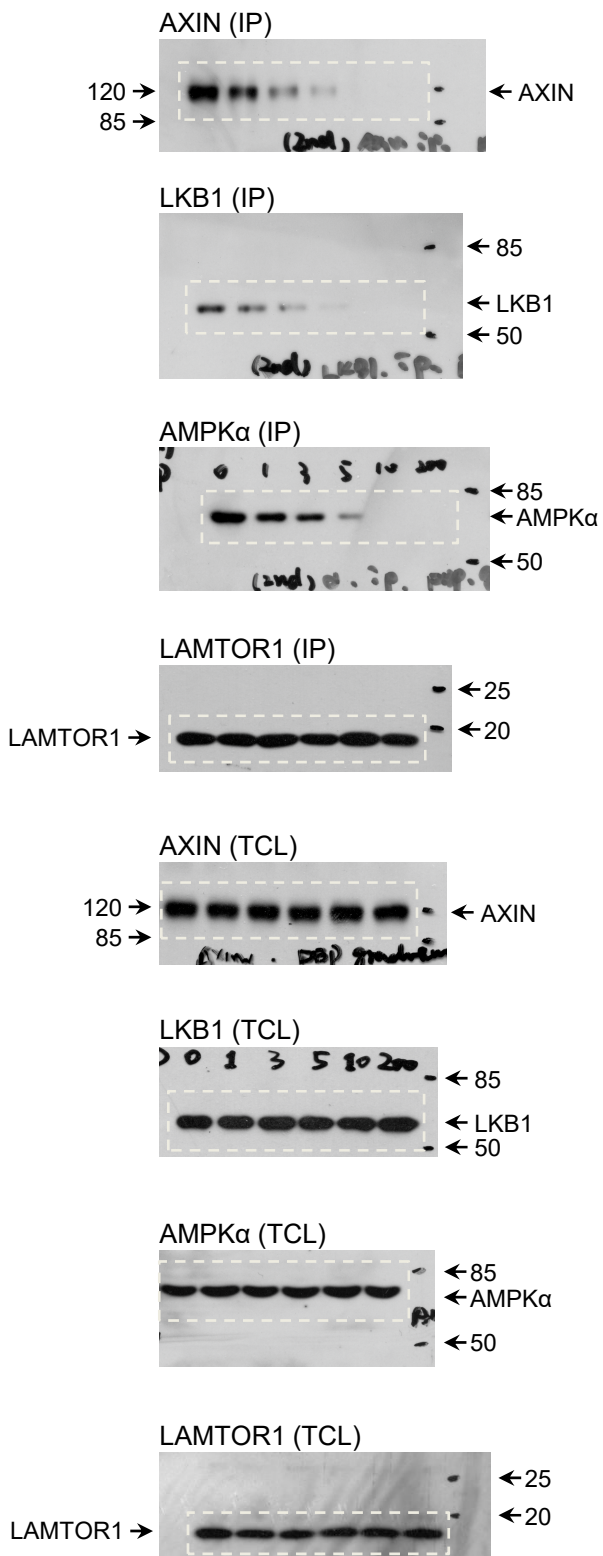

**Fig. 3d**

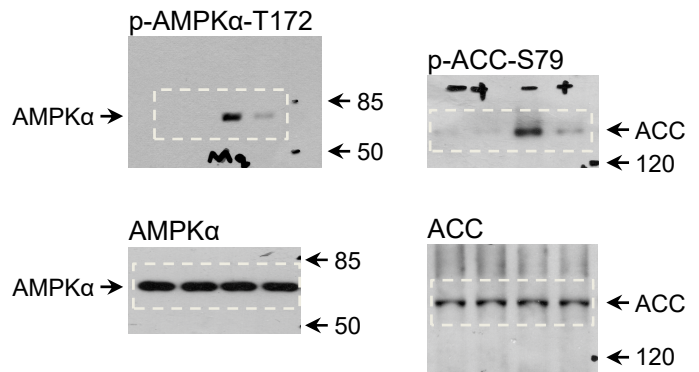

**Fig. 4a**

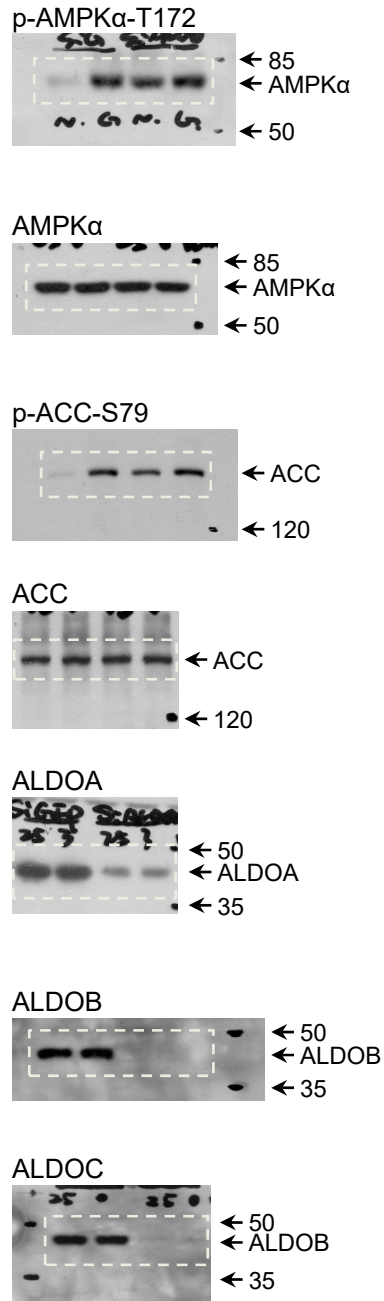

**Fig. 4b**

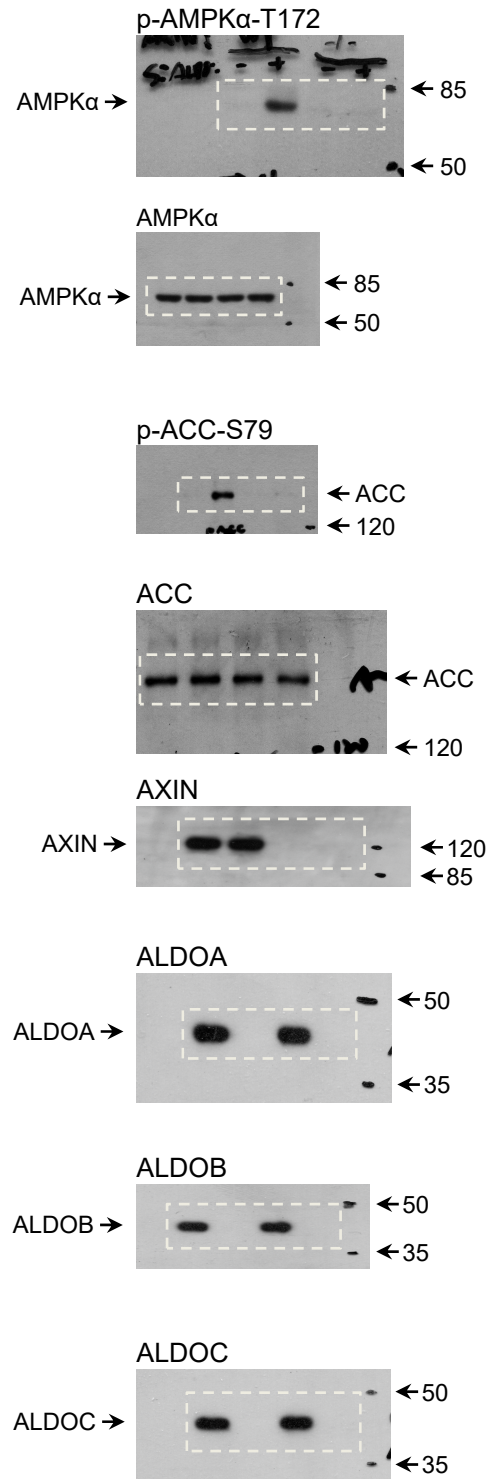

**Fig. 4c**

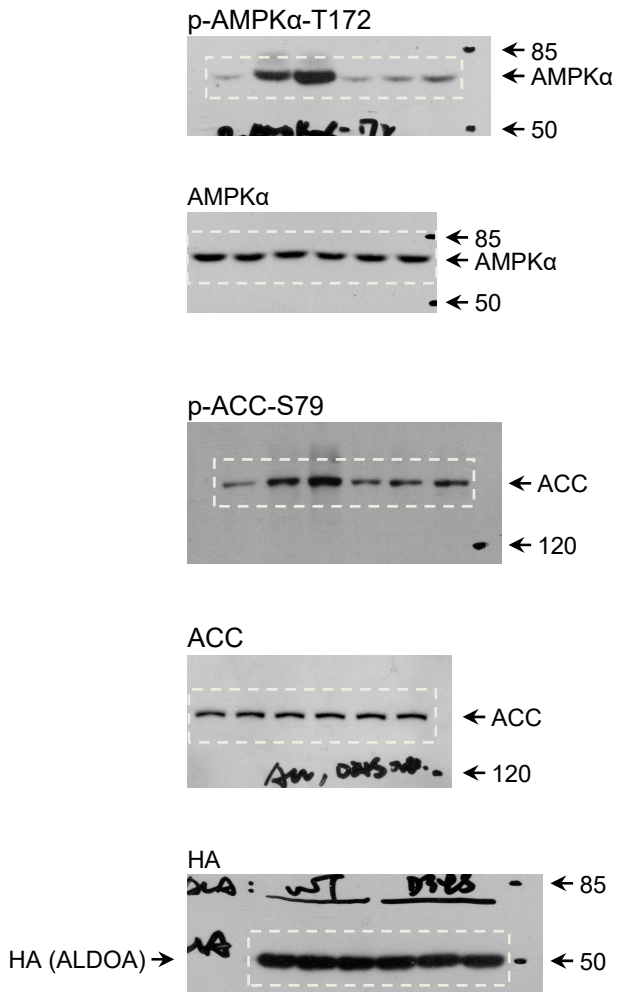

**Fig. 4d**

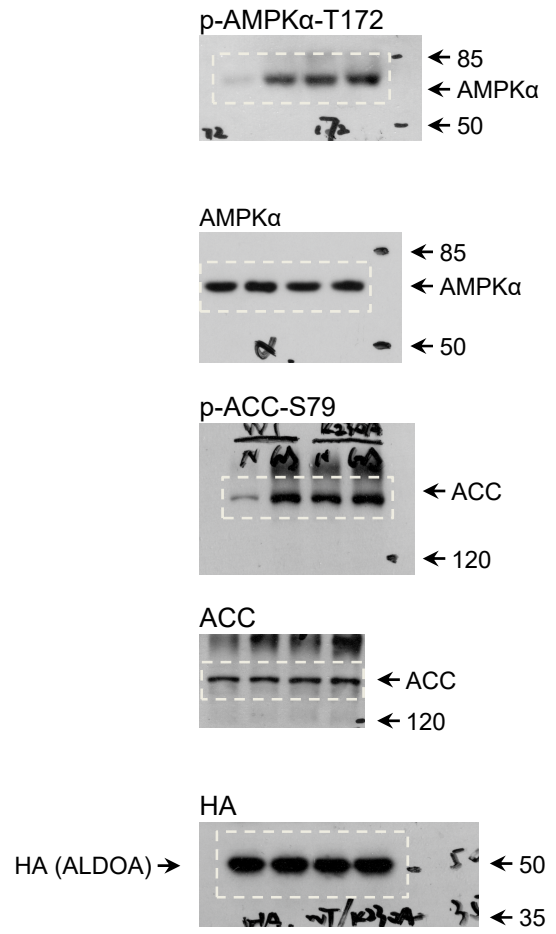

**Extended Data Fig. 1b**

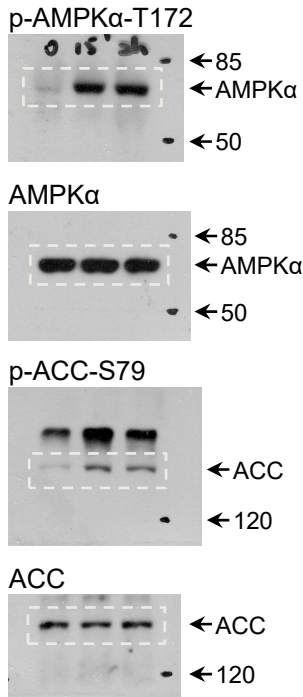

**Extended Data Fig. 1f**

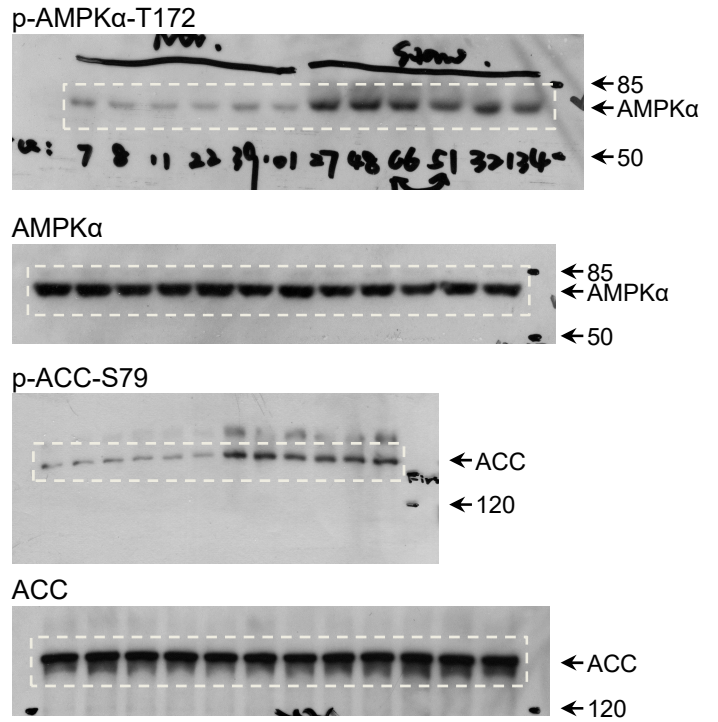

**Extended Data Fig. 2a**

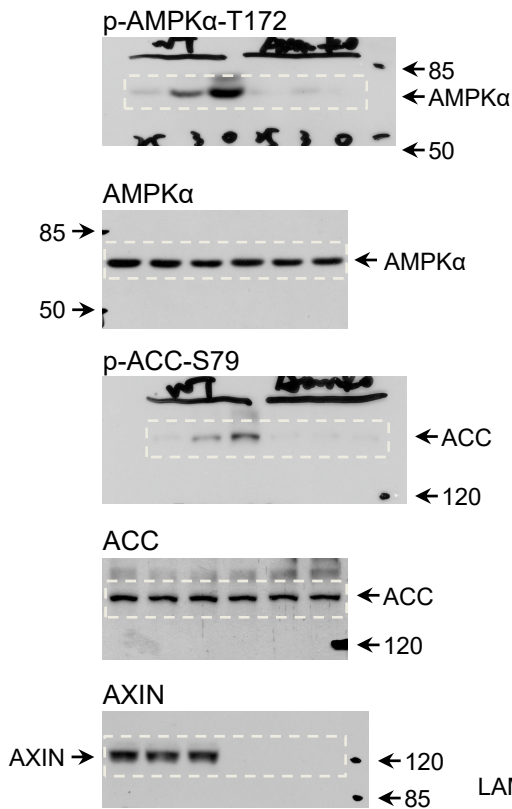

**Extended Data Fig. 2b**

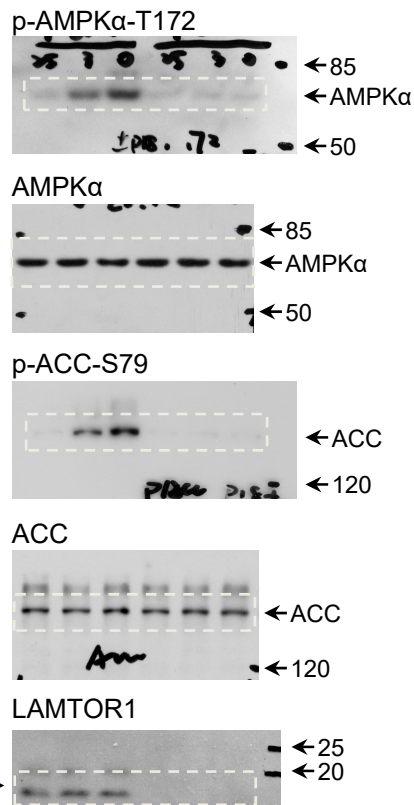

**Extended Data Fig. 2d**

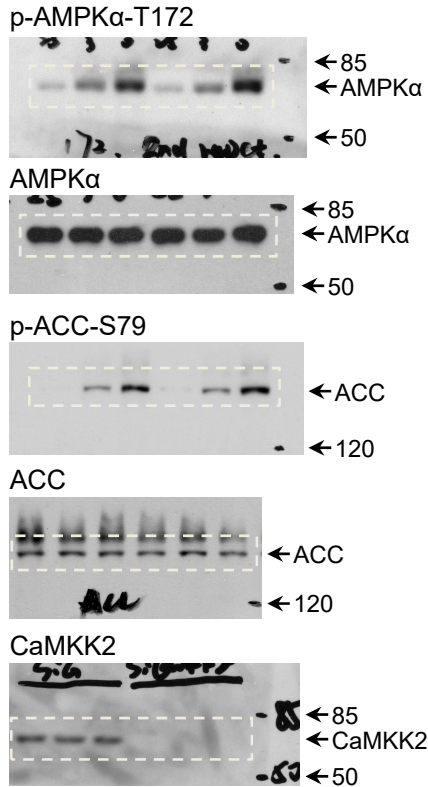

**Extended Data Fig. 3b**

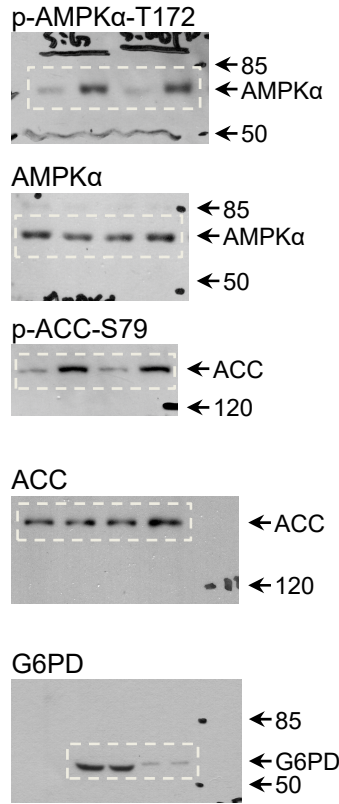

**Extended Data Fig. 3c**

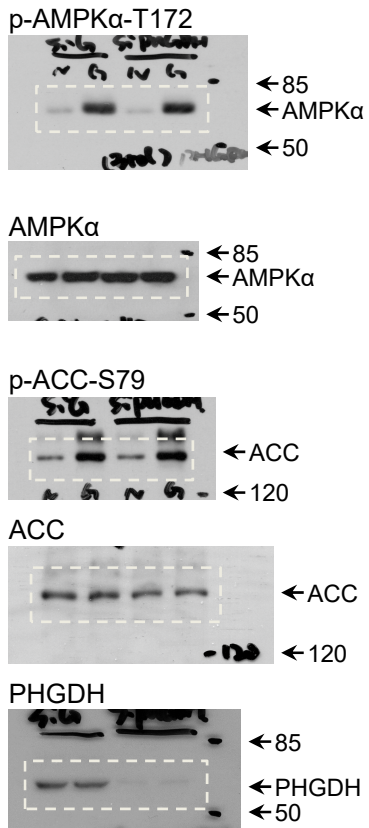

**Extended Data Fig. 3d**

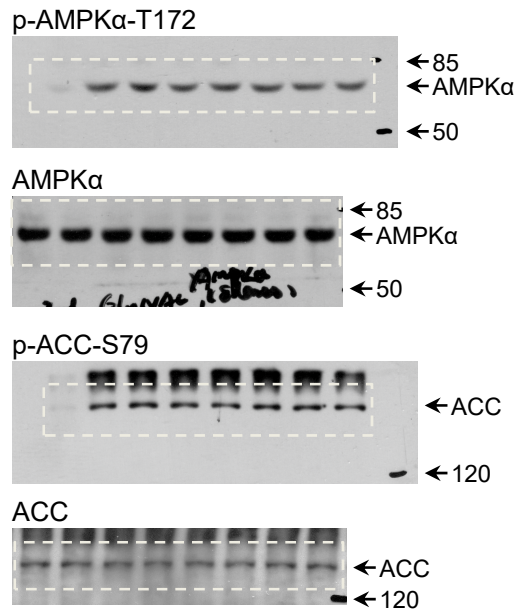



### Extended Data Fig. 4a

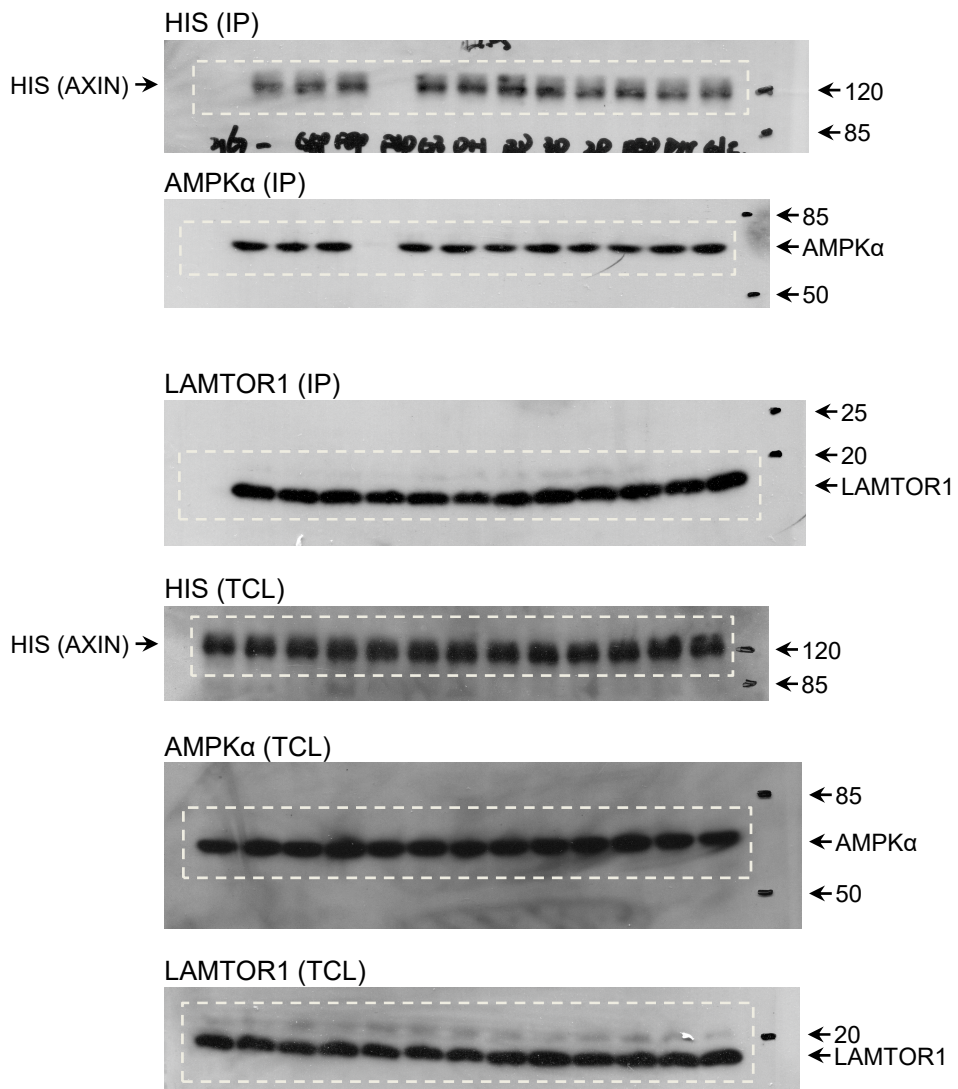

### Extended Data Fig. 4b

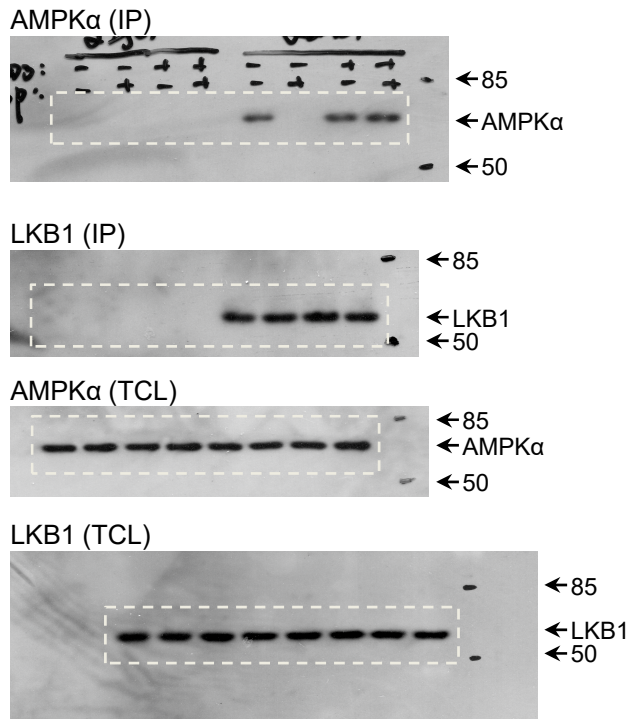

### Extended Data Fig. 4j

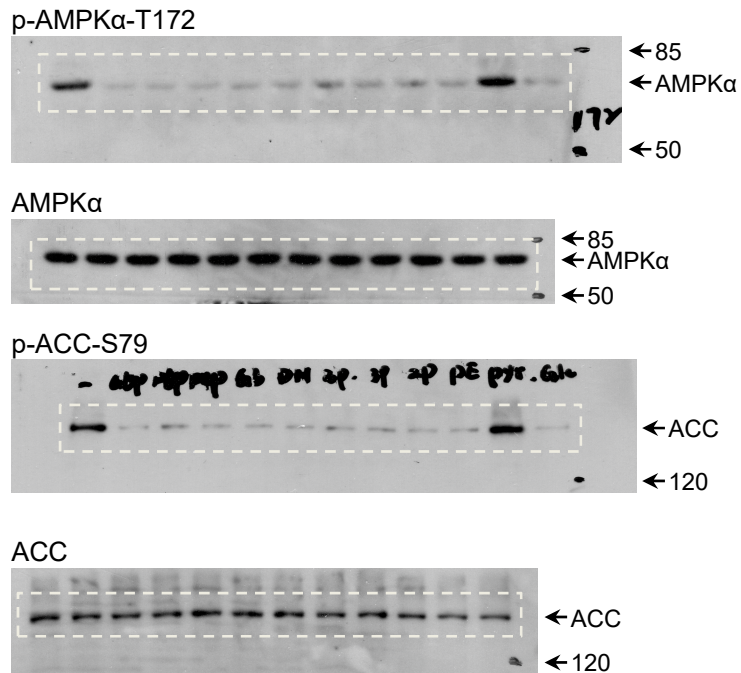

### Extended Data Fig. 4k

p-AMPK $\alpha$ -T172

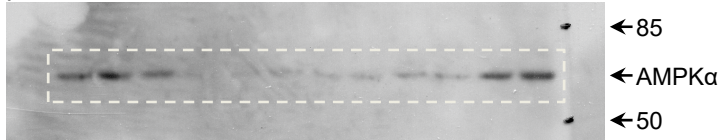

AMPK $\alpha$

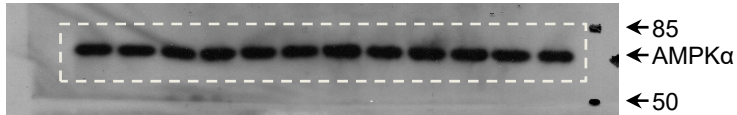

p-ACC-S79

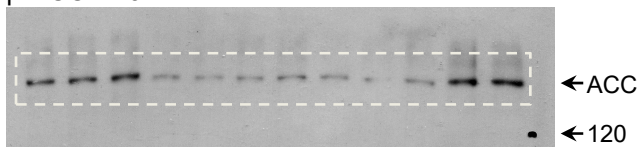

ACC

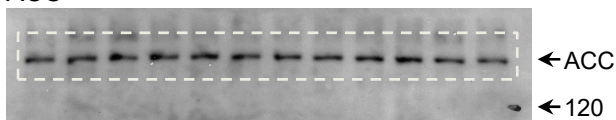

### Extended Data Fig. 4l

TPI

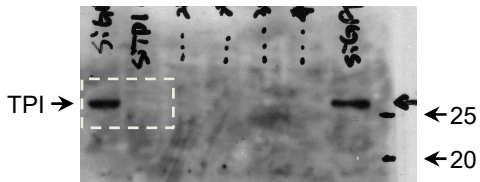

ACTIN

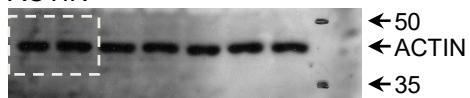

p-AMPK $\alpha$ -T172

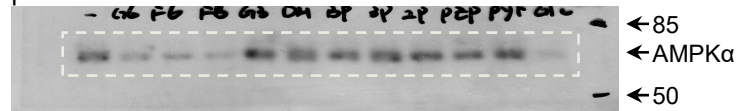

AMPK $\alpha$

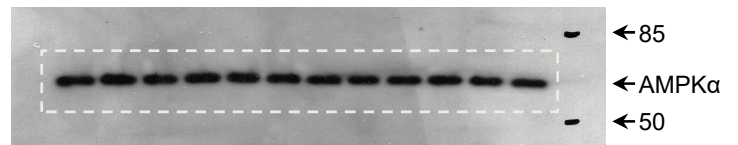

p-ACC-S79

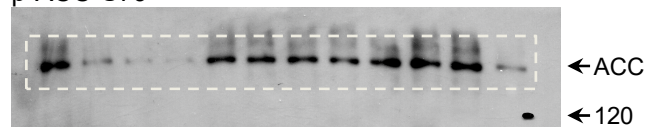

ACC

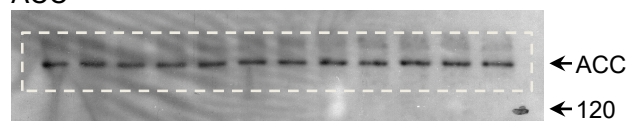

### Extended Data Fig. 5a

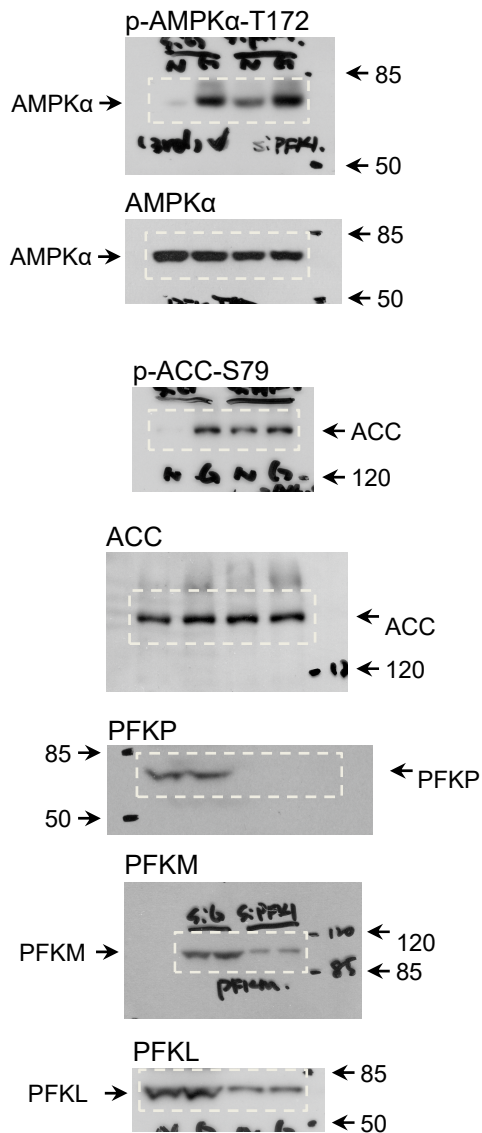

### Extended Data Fig. 5b

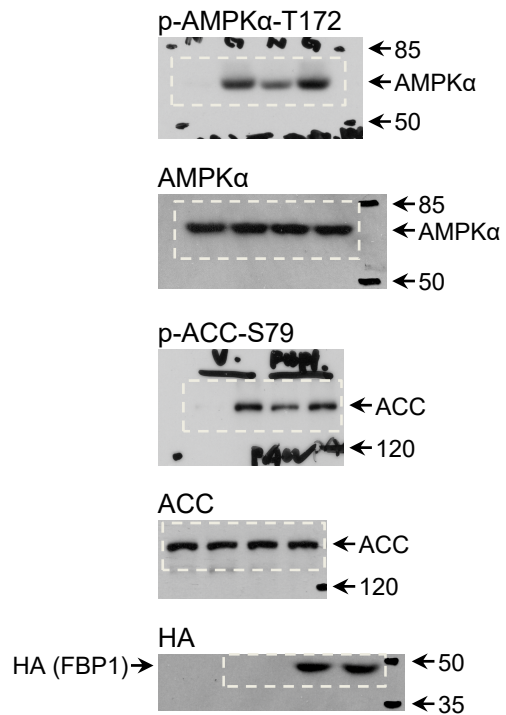

### Extended Data Fig. 5c

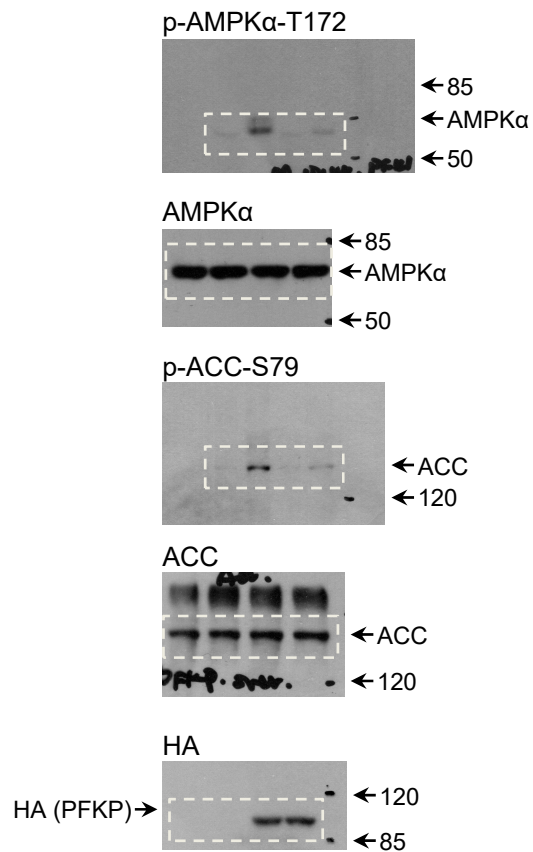

## Extended Data Fig. 5d

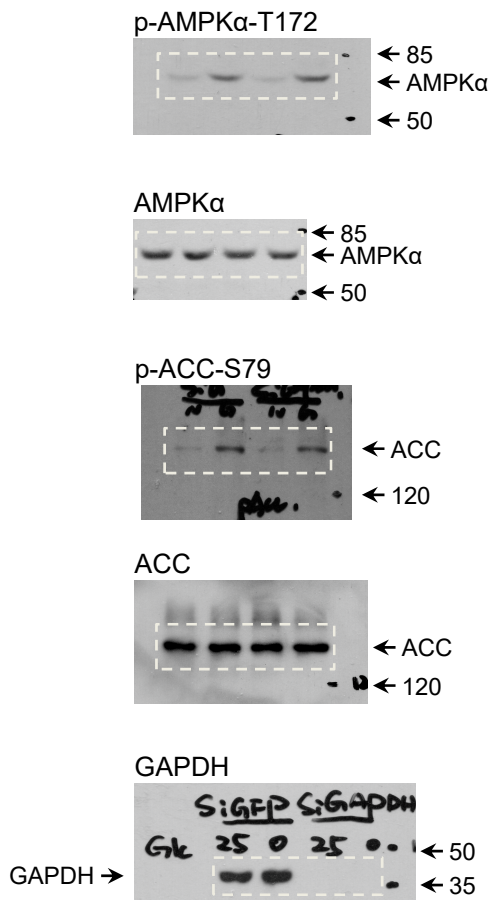

## Extended Data Fig. 6b

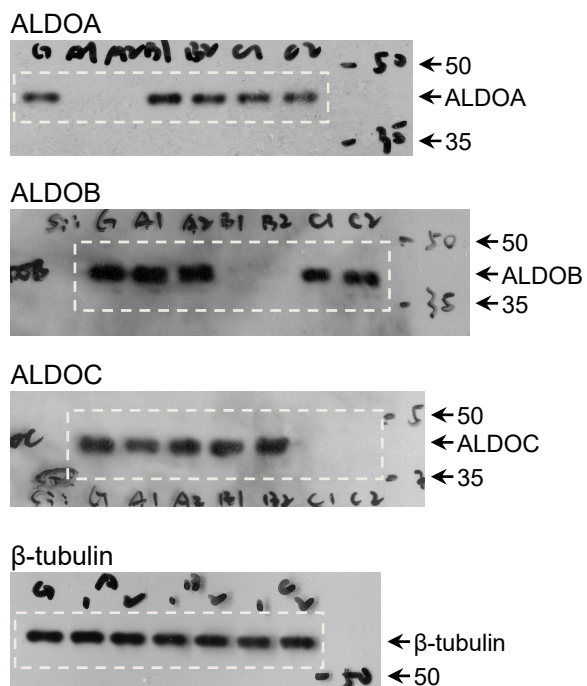

**Extended Data Fig. 6d**

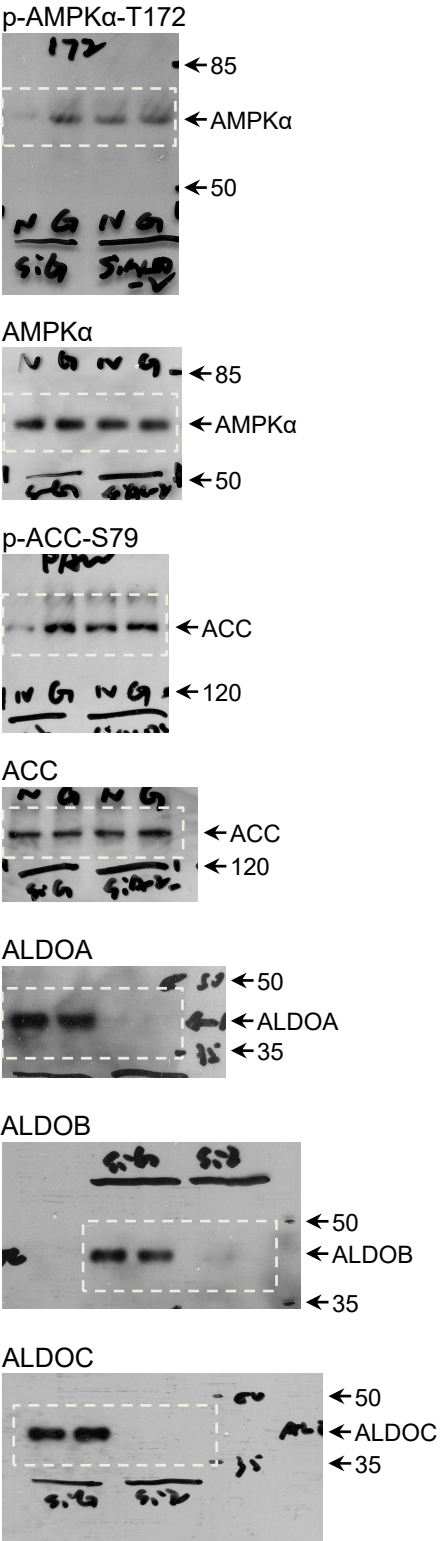

**Extended Data Fig. 6e**

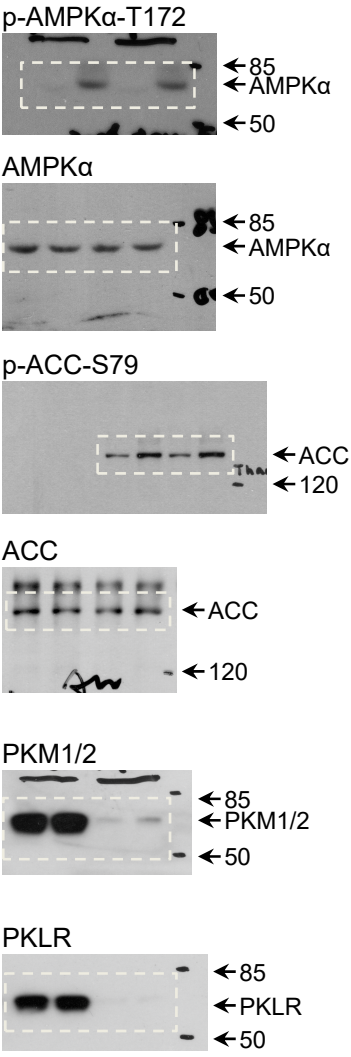

**Extended Data Fig. 6g**

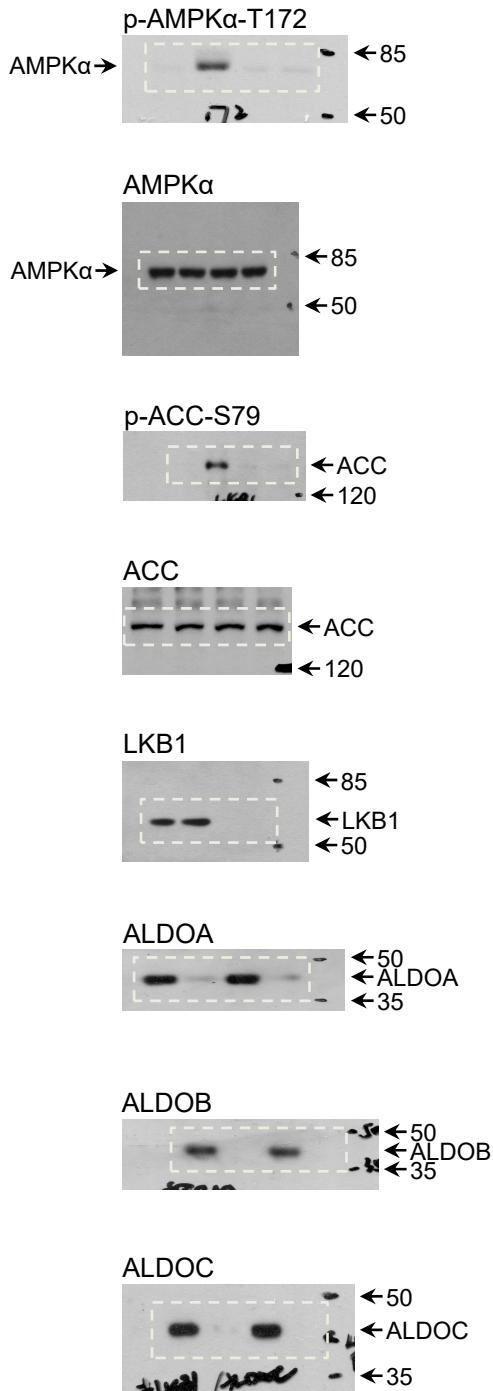

**Extended Data Fig. 6h**

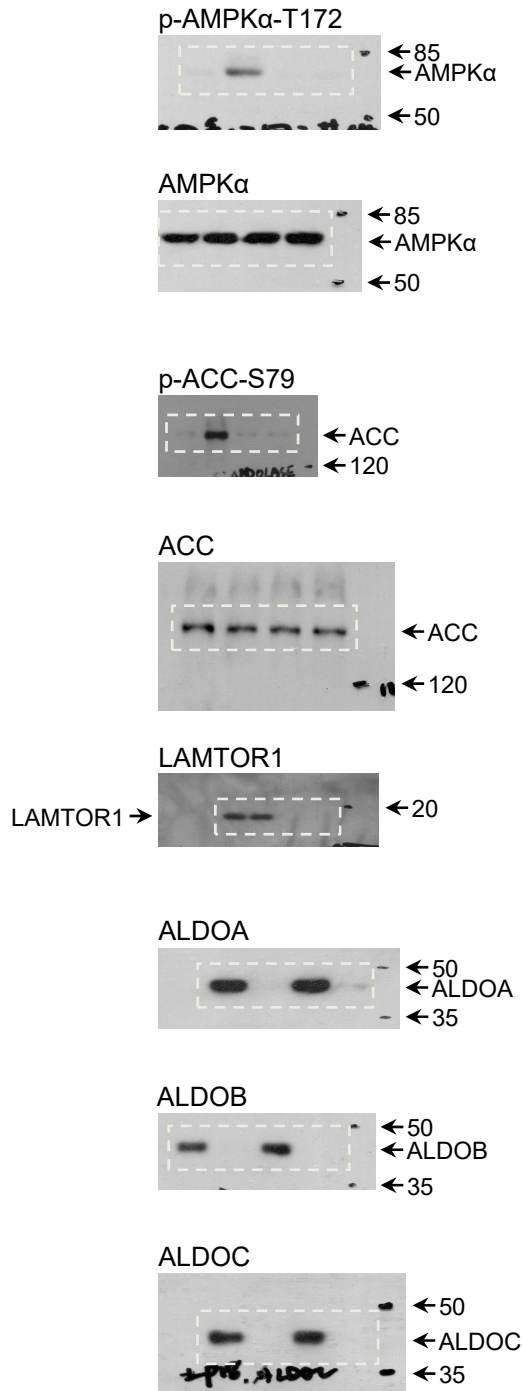

### Extended Data Fig. 6i

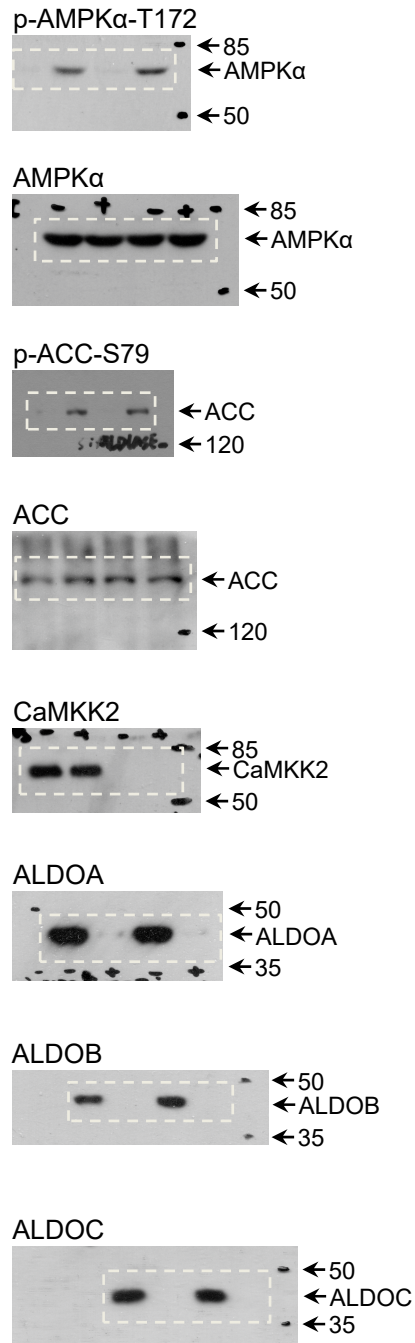

### Extended Data Fig. 6j

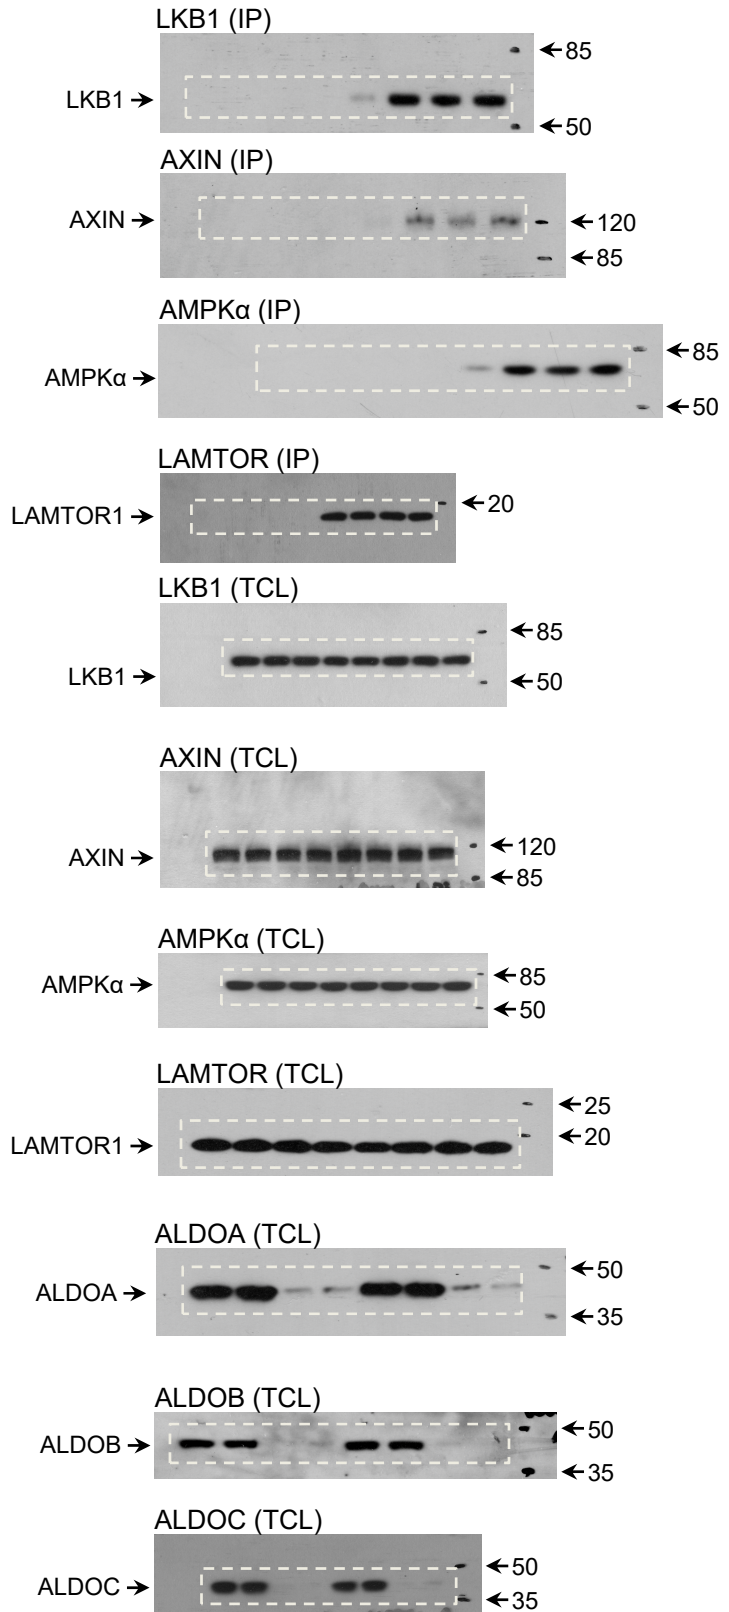



### Extended Data Fig. 6k

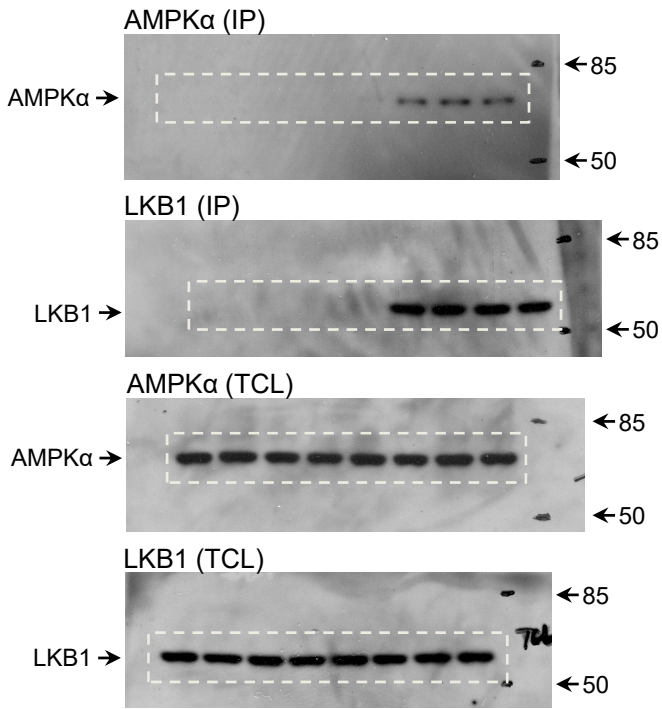

### Extended Data Fig. 6l

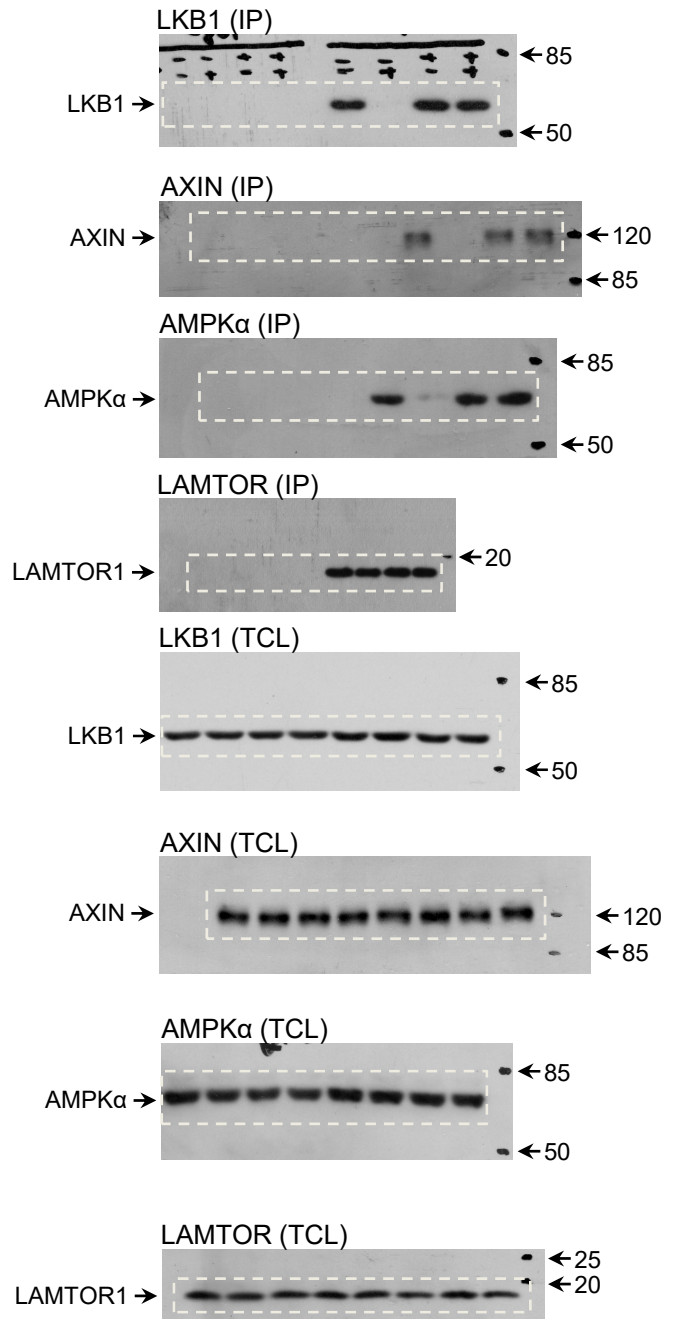

### Extended Data Fig. 6m

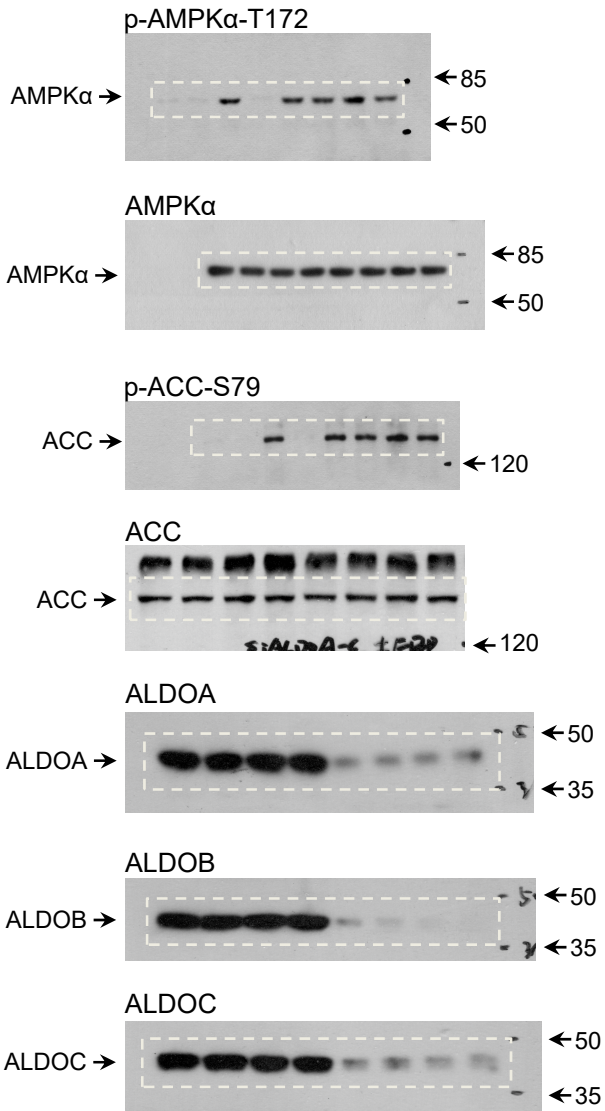

### Extended Data Fig. 6n

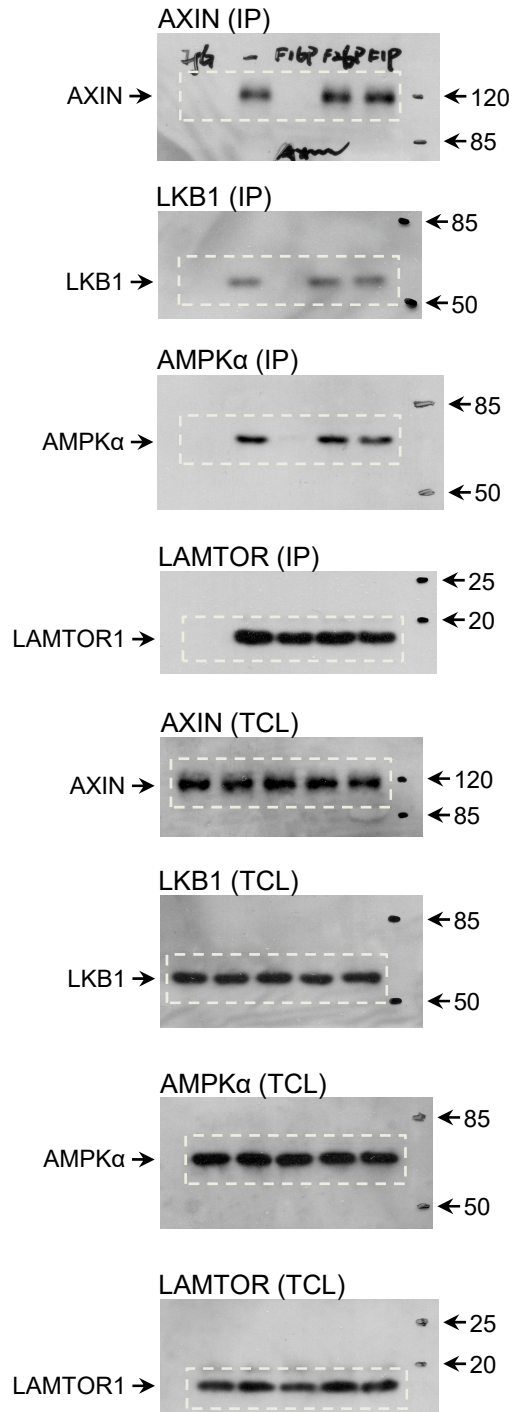

**Extended Data Fig. 8b**

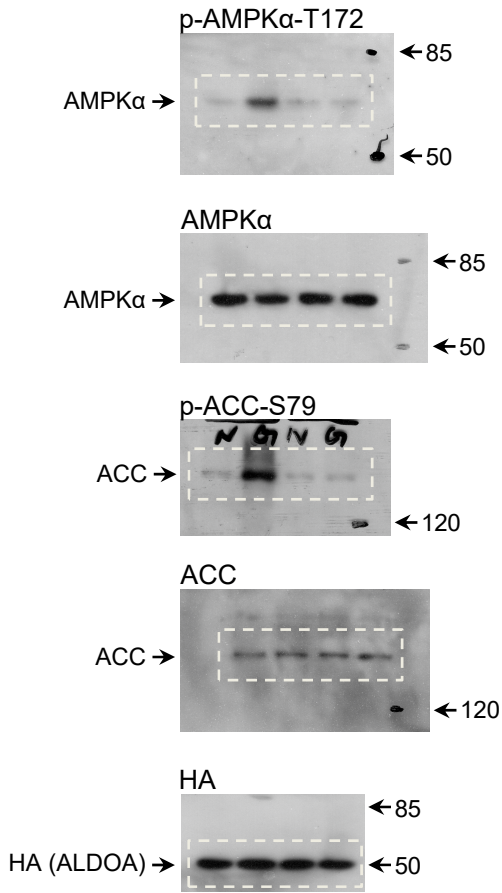

**Extended Data Fig. 8c**

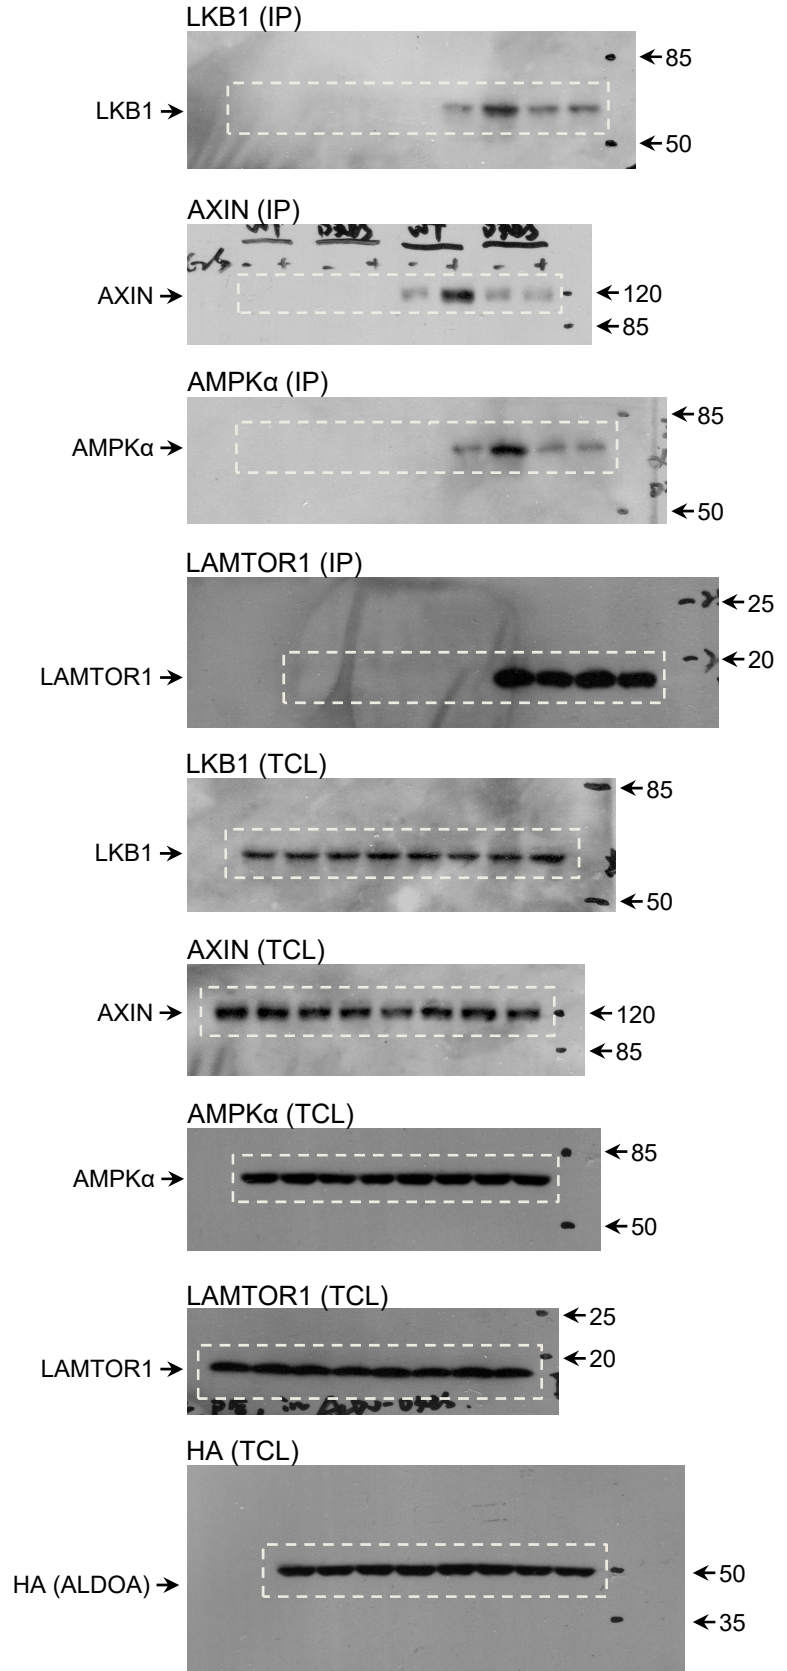

# Extended Data Fig. 8d

p-AMPK $\alpha$ -T172

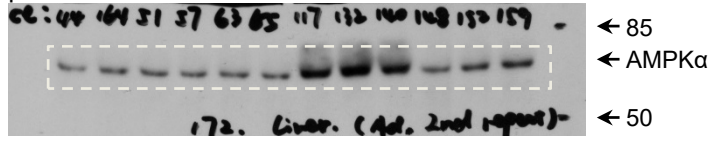

AMPK $\alpha$

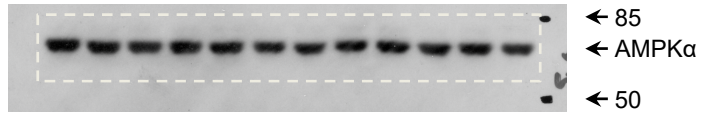

p-ACC-S79

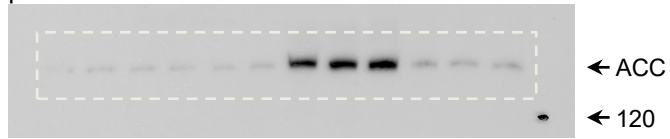

ACC

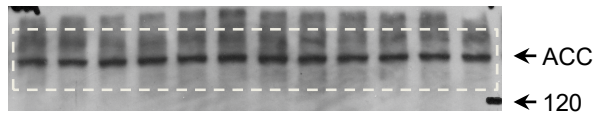

HA

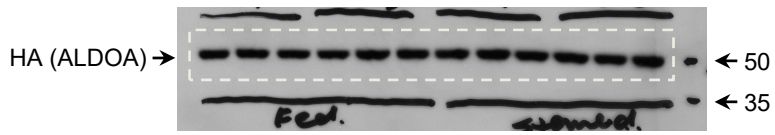

### Extended Data Fig. 8e

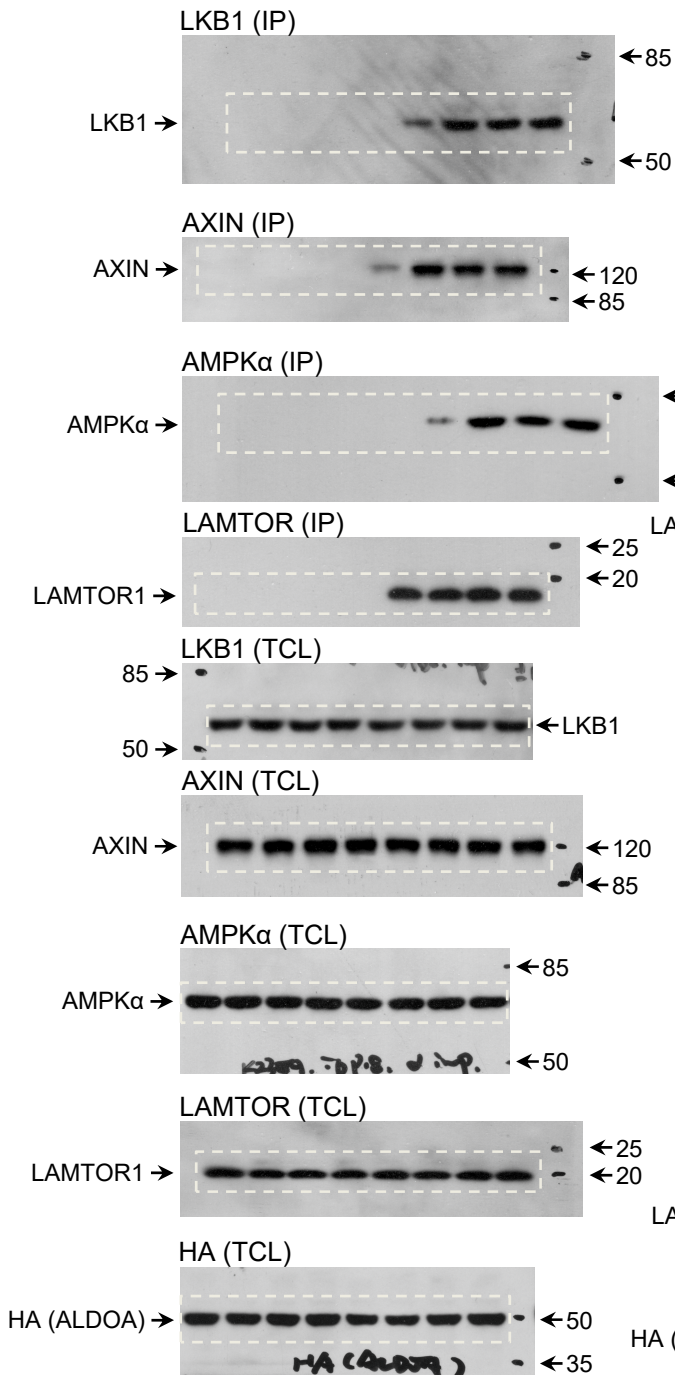

### Extended Data Fig. 8f

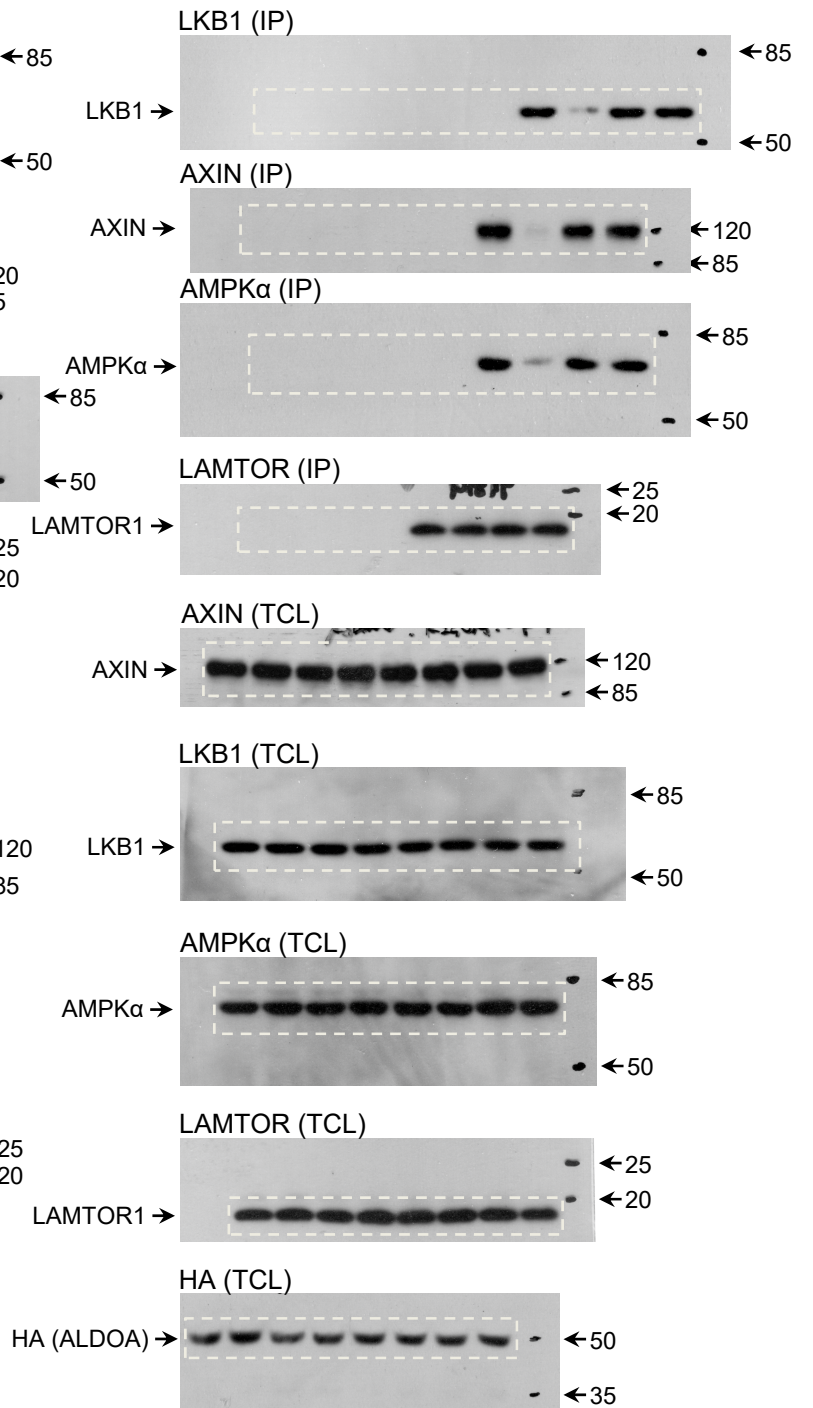

**Extended Data Fig. 8g**

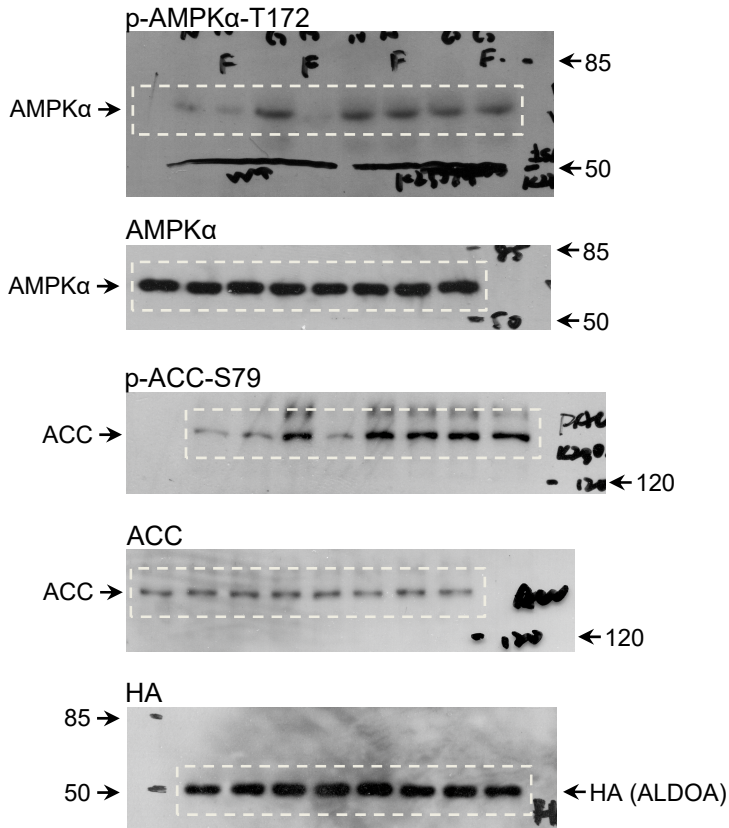

**Extended Data Fig. 10b**

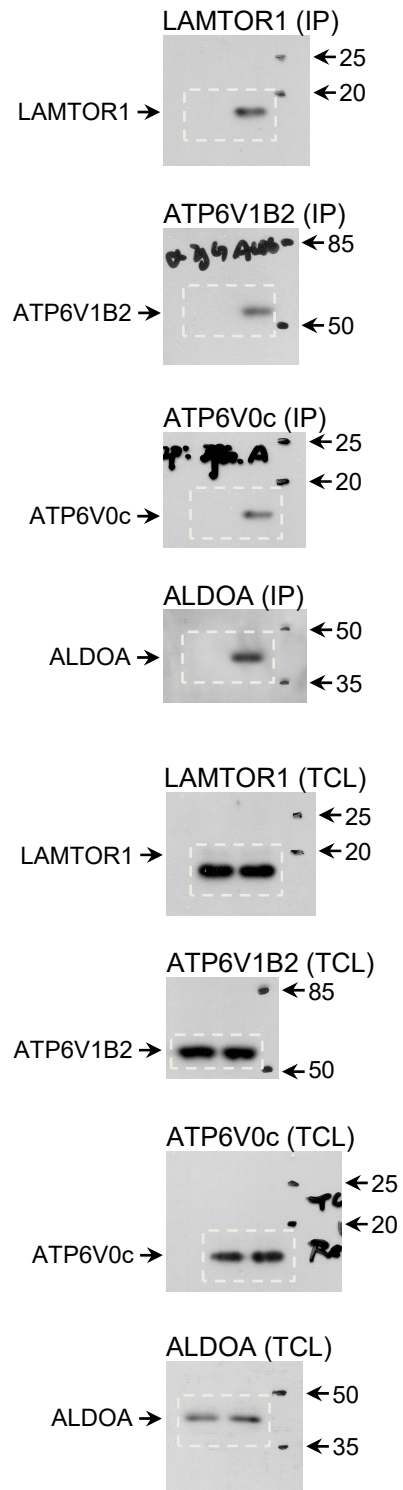

Supplement: NIHMS73130-supplement-Supplementary_data.pdf [file NIHMS73130-supplement-Supplementary_data.pdf]
